# Supplementary material for: Synthesis of single-crystalline Ge1Sb2Te4nanoplates in solution phase
Source: Royal Society of Chemistry journal article supplement (doi:10.1039/c5ce02355f), 2016-01-01
Supplement: c5ce02355f1.pdf [file c5ce02355f1.pdf]

## Supporting Information

### **Synthesis of single-crystalline Ge<sub>1</sub>Sb<sub>2</sub>Te<sub>4</sub> nanoplates in solution phase**

Wei-Hsiang Huang,<sup>‡<sup>a</sup></sup> Tzu-Lun Gao,<sup>‡<sup>a</sup></sup> Chun-Wei Huang,<sup>b</sup> Chia-Fu,  
Chang,<sup>b</sup> Wen-Wei Wu,<sup>\*<sup>b</sup></sup> and Hsing-Yu Tuan<sup>\*<sup>a</sup></sup>

<sup>a</sup>Department of Chemical Engineering, National Tsing Hua University,  
Hsinchu 30013, Taiwan. E-mail: [hytuan@che.nthu.edu.tw](mailto:hytuan@che.nthu.edu.tw)

<sup>b</sup>Department of Materials Science and Engineering, National Chiao Tung  
University, Hsinchu 30010, Taiwan. E-mail: [wwwu@mail.nctu.edu.tw](mailto:wwwu@mail.nctu.edu.tw)

\*Corresponding author.

‡These authors contributed equally to this work.

### ***Materials***

All reagents in this work are analytical grade and commercially available. Antimony(III) chloride ( $\text{SbCl}_3$ ; 99.99%), antimony(III) acetate ( $\text{Sb}(\text{OAc})_3$ ; 99.99%),<sup>1</sup> tellurium powder (Te; 99.997%), germanium(IV) iodide ( $\text{GeI}_4$ ; 99.99%), trioctylphosphine (TOP; 90%),<sup>2</sup> oleic acid (OA; 90%),<sup>2</sup> and oleylamine (OLA; 70%)<sup>2</sup> were purchased from Sigma-Aldrich corporation. Hexamethyldisilazane (HMDS; 98%)<sup>3</sup> was purchased from Acros-Organics corporation.

### ***Equipments used for electrical measurements and characterization***

Powder X-ray diffraction pattern (XRD) analysis was performed on a Rigaku Ultima IV X-ray diffractometer using  $\text{Cu K}\alpha$  radiation source ( $\lambda = 1.54 \text{ \AA}$ ). Scanning electron microscopy (SEM) images were obtained by Hitachi SU8010 for observing the morphology and energy-dispersive x-ray spectroscopy was also done for the composition analysis. High resolution transmission electron microscopy (HRTEM) images and selected area electron diffraction (SAED) were obtained by JEOL ARM200F. Dual-Beam Focus-Ion-Beam (FIB) was performed by FEI (Nova 200) to deposit platinum line on a single GST-124 HP. Dual E-Gun Evaporation System was performed by ULVAC EBX-10C to deposit  $\text{SiO}_2$  layer on a single GST-124 HP. And all electrical measurements were performed with HP 4145B semiconductor parameter analyzer and Agilent 8110A pulse generator.

### ***Synthesis procedure of GST-124 hexagonal plates (HPs)***

GST-124 HPs were synthesized in 50 ml three-neck flask connected to the Schlenk line system under a purified argon atmosphere. 8.24 mg Te and 5.58 mg Sb(Cl)<sub>3</sub> were dissolved separately in 0.5 ml TOP, the former was stirred at 130 °C and the latter was at room temperature (named A and B solution). Meanwhile, 15 mg GeI<sub>4</sub> were dissolved in 10 ml OLA and 1 ml OA, and were ultrasonicated for 20 min (named C solution). A, B, C solutions and 1 ml HMDS were then sequentially injected into 5 ml OLA preheated at 130 °C. As the mixture was heated back to 130 °C, it was held for 20 min to drive out the evaporating gas from HMDS. Then, system was slowly heated (2 °C / min) to 320 °C and aged for 4 hours. The resulting GST-124 HPs were washed by centrifugation at 8000 rpm with approximately 1:5 v/v toluene and ethanol for several times, and were dissolved and kept in toluene.

### ***Fabrication process of SiN<sub>x</sub> membrane devices for measuring the electrical characteristics of GST-124 HPs***

GST-124 HPs was incorporated into a specialized-designed SiN<sub>x</sub> membrane device to demonstrate the electrical properties of it. The SiN<sub>x</sub> membrane device was prepared as reported<sup>1</sup>. To prevent GST-124 HPs from aggregating on the SiN<sub>x</sub> membrane, spin-coating method with 5 μdilute GeSbTe HPs solution at 2000 rpm for 15 sec was used. At low intensity (6.9-pA, 30kV), Ga<sup>+</sup> ion FIB resources was operated to contact the opposite sides of single GST-124 HP with platinum precursors. Later, high intensity (30-pA, 30kV) Ga<sup>+</sup> ion source was used to connect the pre-localized platinum line with electrode of SiN<sub>x</sub> membrane device. Finally, a 40 nm SiO<sub>2</sub> layer was deposited by e-gun evaporation system to finish the fabrication process.

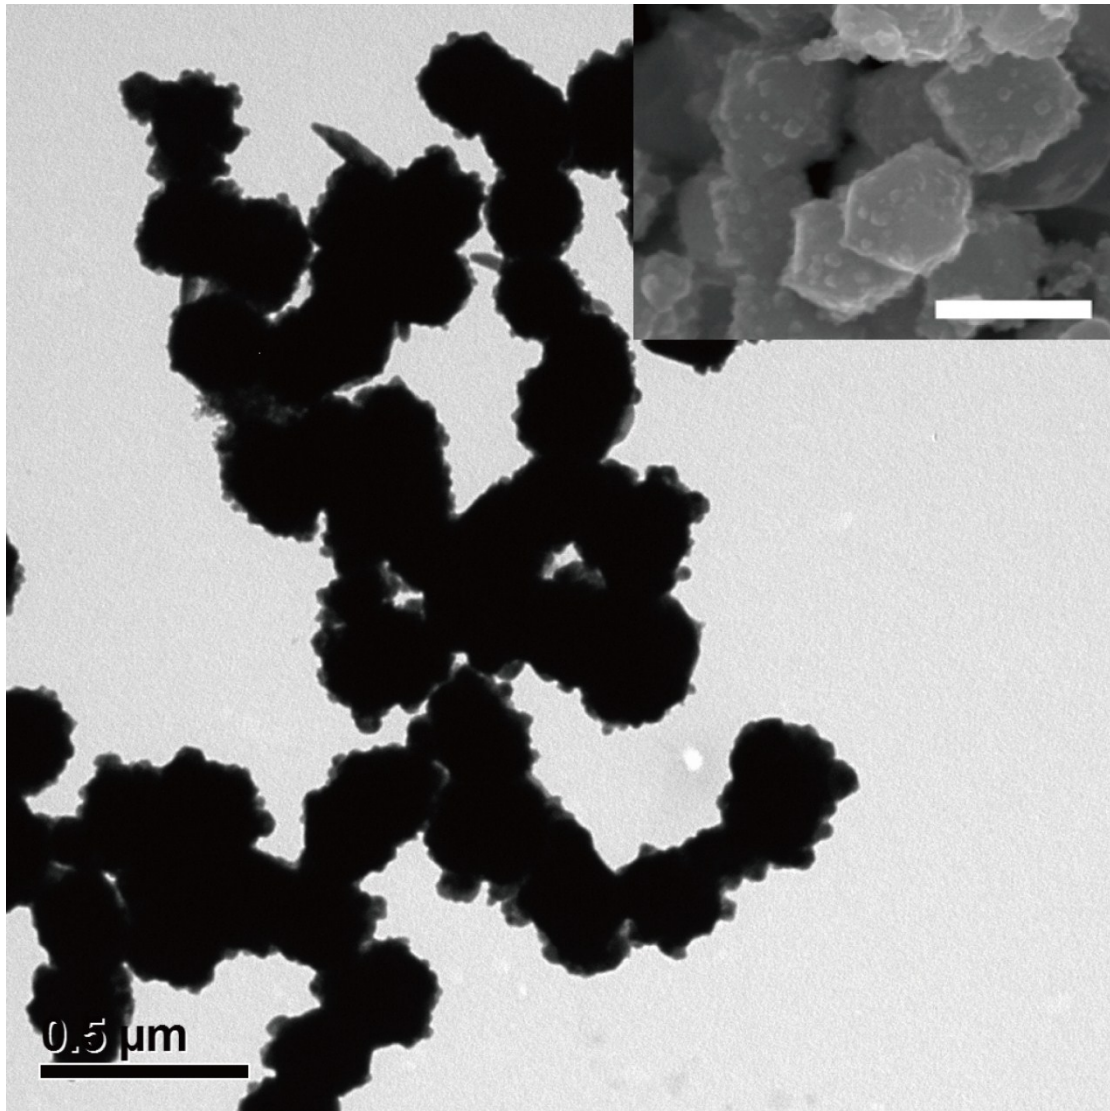

**Fig. S.1. TEM image of as-prepared products using  $\text{Sb}(\text{OAc})_3$  as Sb sources under 320 °C. Inset: SEM image of the same sample. Scale bar: 250 nm.**

**Table S.1. Statistical EDS quantitative analysis results from Fig. S.2**

| Sample No.           | Elemental Atomic Ratio (%) |      |      | Normalized ratio compared to GST-124 |
|----------------------|----------------------------|------|------|--------------------------------------|
|                      | Ge                         | Sb   | Te   |                                      |
| 1                    | 16.2                       | 29.7 | 54.1 | 1.0 : 1.8 : 3.3                      |
| 2                    | 16.8                       | 29.0 | 54.2 | 1.0 : 1.7 : 3.2                      |
| 3                    | 12.3                       | 33.8 | 53.9 | 1.0 : 2.8 : 4.4                      |
| 4                    | 12.1                       | 36.4 | 51.5 | 1.0 : 3.0 : 4.3                      |
| 5                    | 14.5                       | 37.3 | 48.2 | 1.0 : 2.6 : 3.3                      |
| 6                    | 15.6                       | 32.5 | 51.9 | 1.0 : 2.1 : 3.3                      |
| 7                    | 17.7                       | 28.0 | 54.3 | 1.0 : 1.6 : 3.1                      |
| 8                    | 14.3                       | 33.8 | 51.9 | 1.0 : 2.4 : 3.6                      |
| <b>Average</b>       | 14.9                       | 32.6 | 52.5 | 1.0 : 2.2 : 3.5                      |
| <b>Ideal GST-124</b> | 14.3                       | 28.6 | 57.1 | 1.0 : 2.0 : 4.0                      |

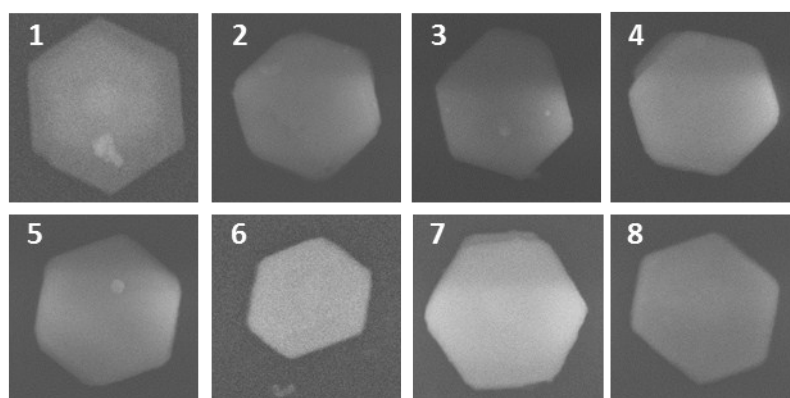

**Fig. S.2. Eight GST-124 nanoplates with different diagonal lengths**

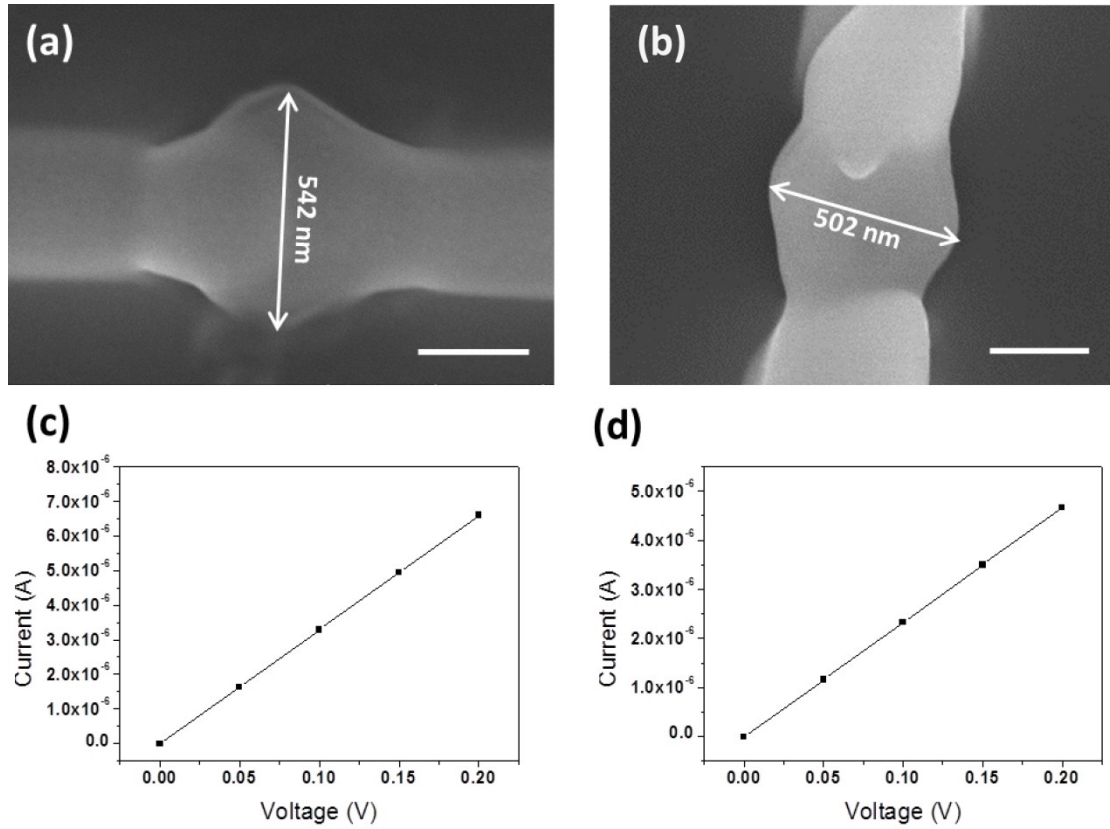

**Fig. S.3.** (a)-b) SEM images and (c)-(d) I-V curves of SiN<sub>x</sub> membrane device with GST-124 nanoplates (Diagonal length = 542, 502 nm)

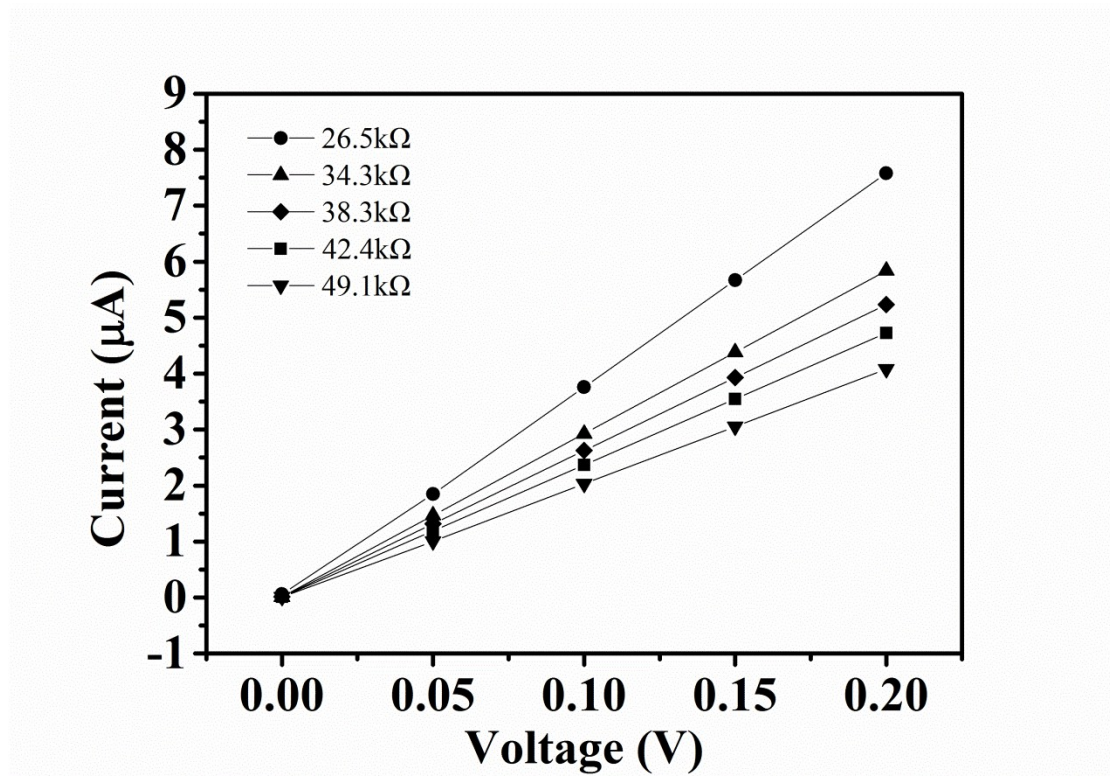

**Fig. S.4.** DC I-V sweep of five different GST-124 nanoplates

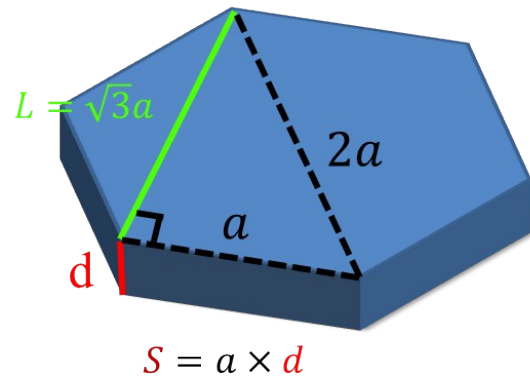

$$R = \rho \frac{L}{S} = \rho \frac{\sqrt{3}a}{a \times d} = \frac{\sqrt{3}\rho}{d} = \frac{\sqrt{3}(1 \times 10^{-3})}{50 \times 10^{-7}} \cong 350 \text{ (Ohm)}$$

**Fig. S.5.** Schematic diagram of a single GST-124 nanoplate and the approximated calculation of the electrical resistance of that with the crystal size as reported here. R : electrical resistance,  $\rho$  : resistivity, about 1 mOhm cm, L : length of the path which current goes through, S : cross-sectional area which current goes through, d : thickness, about 50 nm



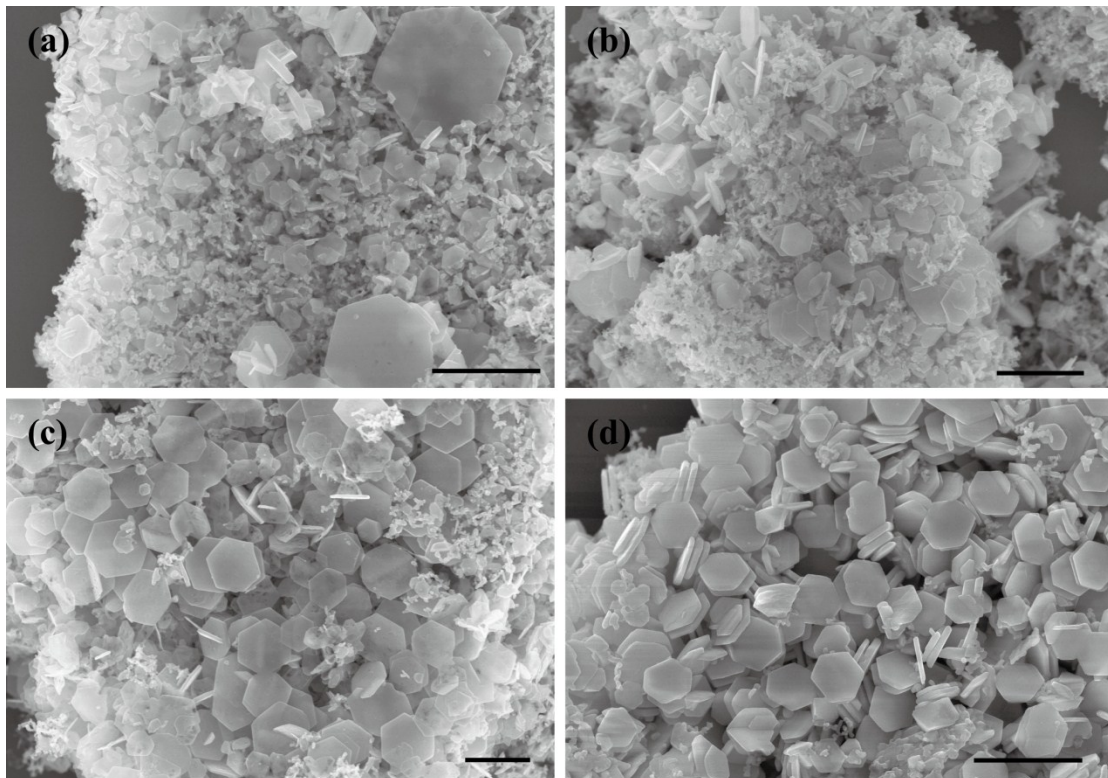

Fig. S.6. SEM images of GST-124 synthesized with different reaction temperatures and times (a)300 °C, 2 hr (b)300 °C, 4 hr (c)320 °C, 2 hr (d)320 °C, 4 hr (scale bar : 1 μm).

References :

1. W. Li, L. Luo, H. Yamashita, J. A. Labinger, and M. E. Davis, *Microporous Mesoporous Mater.*, 2000, **37**, 57-65.
2. W. Luan, H. Yang, N. Fan, and S.-T. Tu, *Nanoscale Res. Lett.*, 2008, **3**, 134 - 139.
3. D. D. Vaughn, J. F. Bondi, and R. E. Schaak, *Chem. Mater.*, 2010, **22**, 6103-6108.
